# Supplementary material for: Autonomy-supportive decision-making in maternity care during prenatal consultations: a qualitative interaction analysis
Source: HighWire-hosted journal article supplement (doi:10.1136/bmjopen-2022-063463), 2022-11-01
Supplement: bmjopen-2022-063463supp001_data_supplement.pdf [file bmjopen-2022-063463supp001_data_supplement.pdf]

Appendix:

Table: Simplified Jeffersonian transcription notation

|                                           |                               |
|-------------------------------------------|-------------------------------|
| W: patient*                               | Hmhm: uh-huh-ing              |
| N: next of kin                            | Hmm: ponder                   |
| P: professional (midwife or obstetrician) | -: unfinished sentence        |
| Heehee: laugh                             | —: speaker is interrupted     |
| ....silence                               | _ _ _ speaker continues       |
| (.) gap in talk of <0.3 seconds           | , a slight rise in intonation |
| . falling intonation                      | ? strongly rise in intonation |

\*In line with the usual jargon in the medical domain, the term patient has been chosen
